# Supplementary material for: Avoiding Routine Oxygen Therapy in Patients With Myocardial Infarction Saves Significant Expenditure for the Health Care System—Insights From the Randomized DETO2X-AMI Trial
Source: Frontiers journal article supplement (doi:10.3389/fpubh.2021.711222), 2022-01-12
Supplement: Data_Sheet_2.pdf [file Data_Sheet_2.pdf]

## Supplemental appendix

To:

### **Avoiding routine oxygen therapy in patients with myocardial infarction saves significant expenditure for the health care system**

#### **– Insights from the randomized DETO2X-AMI trial**

*Robin Hofmann\**, M.D., Ph.D.<sup>a</sup>; *Tamrat Befekadu Abebe\**,<sup>b</sup>; *Johan Herlitz*, M.D., Ph.D.<sup>c</sup>;  
*Stefan K. James*, M.D., Ph.D.,<sup>b,d</sup>; *David Erlinge*, M.D., Ph.D.<sup>e</sup>; *Joakim Alfredsson*, M.D.,  
*Ph.D.*,<sup>f</sup> *Tomas Jernberg*, M.D., Ph.D.<sup>g</sup>; *Thomas Kellerth*, M.D.,<sup>h</sup> *Annica Ravn-Fischer*, M.D.,  
*Ph.D.*; *Bertil Lindahl*, M.D., Ph.D.<sup>b,d</sup>; and *Sophie Langenskiöld*, PhD,<sup>b</sup> for the DETO2X-  
*SWEDEHEART Investigators*

- a) Department of Clinical Science and Education, Division of Cardiology, Karolinska Institutet, Södersjukhuset, Stockholm, Sweden.
- b) Department of Medical Sciences, Uppsala University, Uppsala, Sweden
- c) Department of Health Sciences, University of Borås, Borås, Sweden.
- d) Uppsala Clinical Research Center, Uppsala University, Uppsala, Sweden.
- e) Department of Clinical Sciences, Cardiology, Lund University, Lund, Sweden.
- f) Department of Health, Medicine and Caring Sciences, Linköping University, and Department of Cardiology, Linköping University hospital, Linköping, Sweden.
- g) Department of Clinical Sciences, Cardiology, Karolinska Institutet, Danderyd Hospital, Stockholm, Sweden.
- h) Department of Cardiology, Faculty of Medicine and Health, Örebro University, Örebro
- i) Department of Molecular and Clinical Medicine and Sahlgrenska University Hospital, Department of Cardiology, University of Gothenburg, Gothenburg, Sweden

\*Shared first author

## Table of contents

|                                                                                                                               |   |
|-------------------------------------------------------------------------------------------------------------------------------|---|
| Summary of estimated staff costs related to oxygen therapy (table A1)                                                         | 3 |
| Summary of estimated costs of oxygen and medical supplies (table A2)                                                          | 4 |
| Direct medical cost of oxygen therapy in patients with STEMI (table A3)                                                       | 5 |
| Direct medical cost of oxygen therapy in patients with NSTEMI (table A4)                                                      | 6 |
| Two-way sensitivity analysis of the cost of oxygen therapy compared to ambient air for patients with MI in Sweden (table A5)  | 7 |
| Threshold analysis of total direct cost by varying treatment costs for patients with STEMI who develop hypoxemia (figure A1)  | 8 |
| Threshold analysis of total direct cost by varying treatment costs for patients with NSTEMI who develop hypoxemia (figure A2) | 9 |

**Table A1: Summary of estimated time spent with tasks related to oxygen therapy**

|                                | Ambulance<br>service<br>(n=63) | Emergency<br>department<br>(n=31) | Cardiology<br>department<br>(n=86) |
|--------------------------------|--------------------------------|-----------------------------------|------------------------------------|
| Tasks<br>minutes, median (IQR) |                                |                                   |                                    |
| Inform the patient             | 1 (1-2)                        | 2 (1-5)                           | 2 (1-5)                            |
| Prepare and connect equipment  | 1 (1-2)                        | 2 (1-5)                           | 2 (1-5)                            |
| Adjust oxygen flow rate        | 1 (1-1)                        | 1 (1-3)                           | 1 (1-2)                            |
| Assisting the patient          | 1 (1-1.5)                      | 2 (1-5)                           | 2 (1-3.75)                         |
| Register data                  | 1 (1-2)                        | 3 (1-5)                           | 2 (1-4)                            |
| Average total time             | 6 (5-10)                       | 11 (6-20.5)                       | 9 (7-18.8)                         |

IQR denotes interquartile range

**Table A2: Summary of estimated costs of oxygen and medical supplies**

| Variable                                        | Unit | Value  |
|-------------------------------------------------|------|--------|
| Hudson mask                                     | USD  | 1.21   |
| Hudson mask with reservoir                      | USD  | 3.83   |
| Open face mask                                  | USD  | 3.74   |
| Extension cord                                  | USD  | 3.55   |
| Connector                                       | USD  | 0.12   |
| Cost of oxygen therapy per liter (mobile tank)  | USD  | 0.02   |
| Cost of oxygen therapy per liter (central tank) | USD  | <0.001 |
| Rental cost of oxygen mobile tank per hour      | USD  | 0.01   |
| Rental cost of oxygen central tank per hour     | USD  | 0.18   |
| Salary (nurses), per hour                       |      |        |
| Ambulance service                               | USD  | 43.17  |
| Emergency department                            | USD  | 42.19  |
| Cardiology department                           | USD  | 46.51  |
| Social security benefit                         | %    | 51     |
| USD: United States Dollar                       |      |        |

In patients transported by ambulance, a closed Hudson mask with or without reservoir bag was used. We assumed Hudson masks with reservoir (standard for most ambulance organizations at the time) in  $\frac{3}{4}$  of the cases and in  $\frac{1}{4}$  Hudson masks without reservoir. Hudson masks were replaced by an open face mask which was used in all cases from hospital arrival throughout the duration of the treatment. In the ambulance service and during transportation between units at hospital, a mobile oxygen tank was used. From arrival at hospital, the oxygen

was supplied from the central tank of the hospital. Regardless of facility or type of mask, the oxygen flow rate was constant at 6L/min for the duration of the intervention.

**Table A3: Total calculated cost related to oxygen therapy including cost of a drug, medical supplies, and staff per patient and care episode for patients with STEMI**

| Direct costs                  | Cost (in USD) |         |
|-------------------------------|---------------|---------|
|                               | Average       | Total   |
| Oxygen therapy                | 12.25         | 17, 528 |
| Small tank rental*            | 0.01          | 18      |
| Big tank rental**             | 1.23          | 1,755   |
| Mask***                       | 6.00          | 8,591   |
| Extension cord                | 3.41          | 4,880   |
| Connector                     | 0.11          | 160     |
| Nurse - ambulance service     | 3.31          | 4,443   |
| Nurse - emergency department  | 2.97          | 4,244   |
| Nurse – cardiology department | 6.69          | 9,574   |
| Total                         | 35.99         | 51,198  |
| USD: United States Dollar     |               |         |

\*Small tank rental cost: 0.20 USD per day which is equivalent to around 0.01 USD per hour.

\*\* Big tank rental cost: 130 USD per month which is equivalent to around 4.30 USD per day and approximately 0.20 USD per hour.

\*\*\* Mask cost is the average of Hudson mask (with or without reservoir) and open face mask.

**Table A4: Total calculated cost related to oxygen therapy including cost of a drug, medical supplies, and staff per patient and care episode for patients with NSTEMI**

| Direct costs                  | Cost (in USD) |        |
|-------------------------------|---------------|--------|
|                               | Average       | Total  |
| Oxygen therapy                | 11.11         | 11,584 |
| Mobile tank rental*           | 0.01          | 12     |
| Central tank rental**         | 1.38          | 1,442  |
| Mask***                       | 5.43          | 5,662  |
| Extension cord                | 3.41          | 3,557  |
| Connector                     | 0.11          | 117    |
| Nurse - ambulance service     | 2.49          | 2,416  |
| Nurse - emergency department  | 6.50          | 6,782  |
| Nurse – cardiology department | 6.69          | 6,977  |
| Total                         | 37.13         | 38,549 |
| USD: United States Dollar     |               |        |

\*Mobile tank rental cost: 0.20 USD per day which is equivalent to around 0.01 USD per hour.

\*\* Central tank rental cost: 130 USD per month which is equivalent to around 4.30 USD per day and approximately 0.20 USD per hour.

\*\*\* Mask cost is the average of Hudson mask (with or without reservoir) and open face mask.

**Table A5: Two-way sensitivity analysis of the cost of oxygen therapy compared to ambient air for patients with MI in Sweden**

| Hypoxemia<br>treatment cost | Probability of oxygen saturation >90% on admission |              |              |              |
|-----------------------------|----------------------------------------------------|--------------|--------------|--------------|
|                             | 85%                                                | 90%          | 95%          | 100%         |
| 0.00 USD                    | 514 060 USD                                        | 544 299 USD  | 574 538 USD  | 604 777 USD  |
| 49.20 USD                   | 484 334 USD                                        | 512 824 USD  | 541 314 USD  | 569 805 USD  |
| 100.00 USD                  | 432 467 USD                                        | 457 906 USD  | 483 345 USD  | 508 785 USD  |
| 200.00 USD                  | 350 874 USD                                        | 371 513 USD  | 392 153 USD  | 412 792 USD  |
| 300.00 USD                  | 269 280 USD                                        | 285 120 USD  | 300 960 USD  | 316 800 USD  |
| 400.00 USD                  | 187 687 USD                                        | 198 727 USD  | 209 767 USD  | 220 808 USD  |
| 500.00 USD                  | 106 093 USD                                        | 112 334 USD  | 118 575 USD  | 124 816 USD  |
| 600.00 USD                  | 24 500 USD                                         | 25 941 USD   | 27 382 USD   | 28 823 USD   |
| 630.03 USD                  | 0,00 USD                                           | 0,00 USD     | 0,00 USD     | 0,00 USD     |
| 700.00 USD                  | -57 094 USD                                        | -60 452 USD  | -63 811 USD  | -67 169 USD  |
| 800.00 USD                  | -138 687 USD                                       | -146 845 USD | -155 003 USD | -163 161 USD |
| 900.00 USD                  | -220 281 USD                                       | -233 238 USD | -246 196 USD | -259 154USD  |
| 1 000.00 USD                | -301 874 USD                                       | -319 631 USD | -337 389 USD | -355 146 USD |

A two-way sensitivity analysis was executed to estimate annual costs for the entire Swedish MI population by varying the proportion between 85%-100% of patients with oxygen saturation  $\geq$  90% at baseline, and the cost of treating hypoxemia by means of a threshold analysis.



**Figure A1: Threshold analysis of total direct cost by varying treatment costs for patients with STEMI who develop hypoxemia**

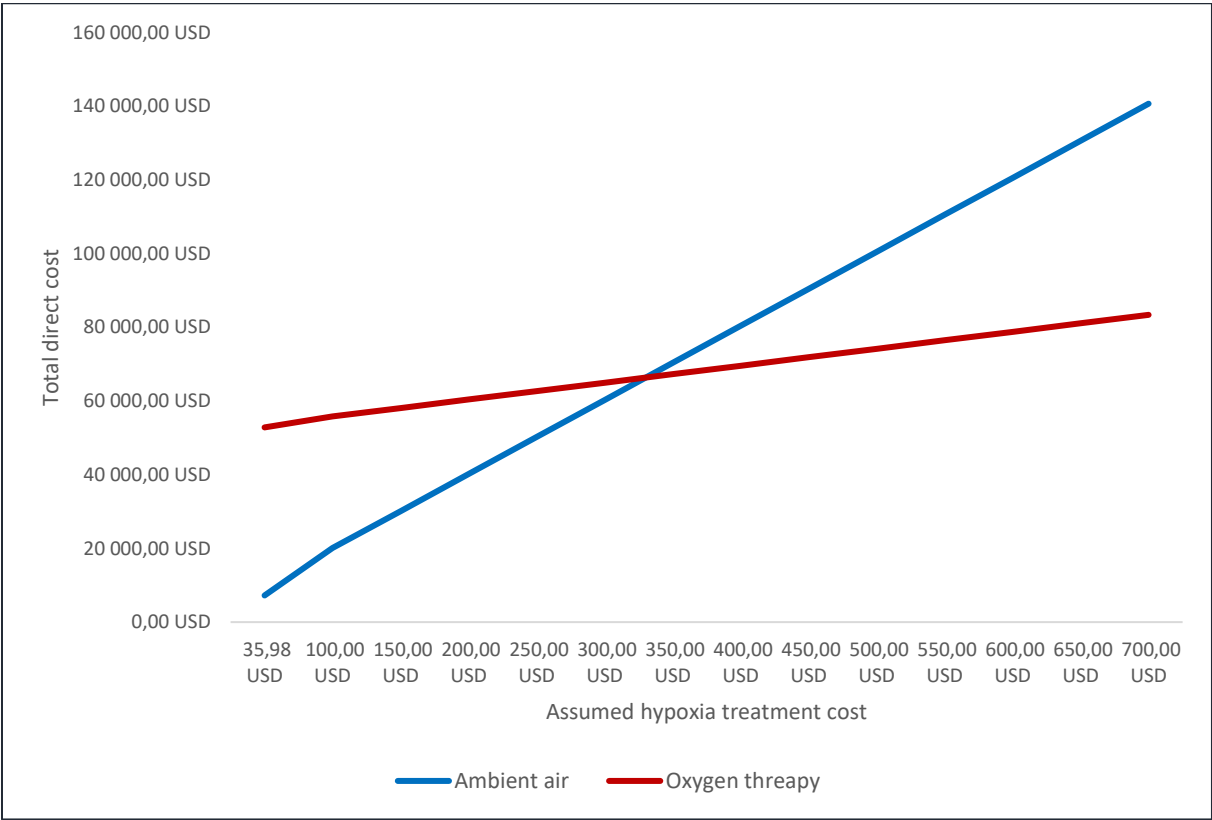

Threshold analysis to display the impact of the potential costs on the cost-benefit ratio per treatment group. The threshold was defined as the average total cost for oxygen treatment in patients in the ambient-air group who develop hypoxemia at which the cost for routine oxygen treatment per patient becomes the more cost-effective approach. The minimum hypoxia treatment cost assumed in the calculation was the average cost for routine oxygen therapy per ST-elevation myocardial infarction (STEMI) patient from the DETO2X-AMI trial (36 USD).

In the threshold analysis, routine oxygen therapy becomes cost saving at 330 USD in patients with STEMI.

**Figure A2: Threshold analysis of total direct cost by varying treatment costs for patients with NSTEMI who develop hypoxemia**

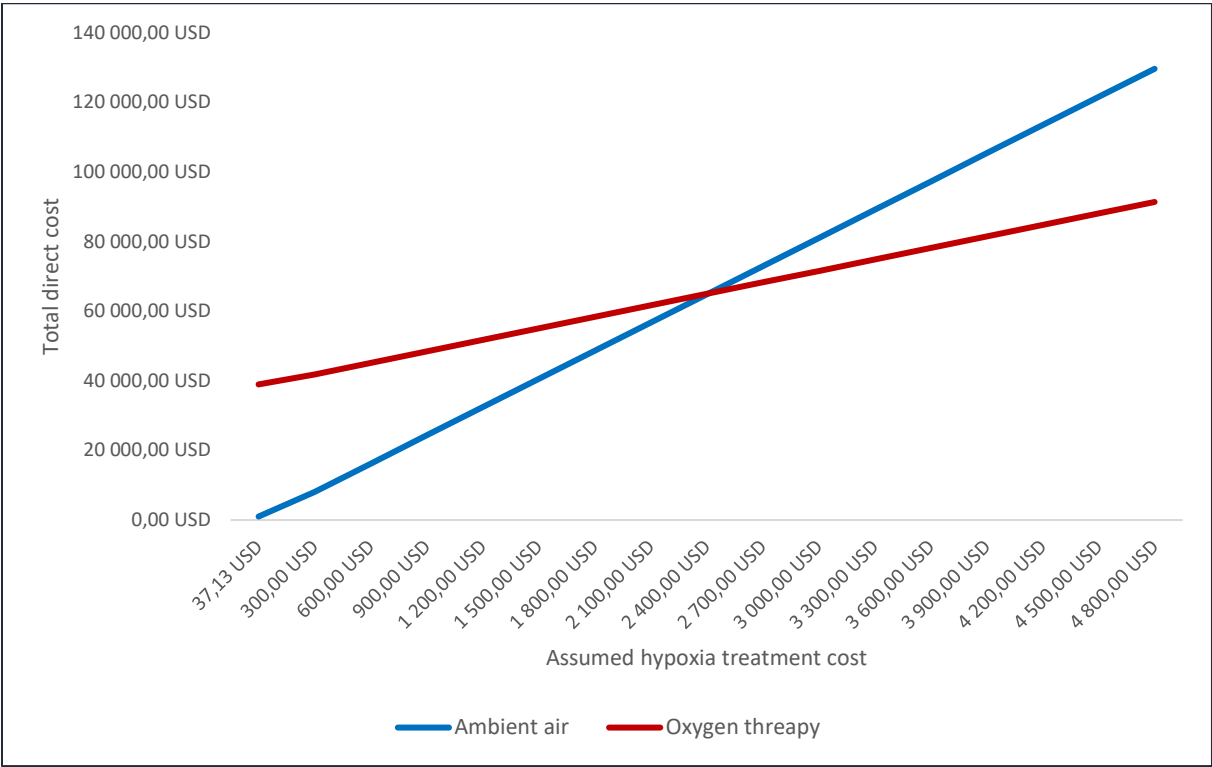

Threshold analysis to display the impact of the potential costs on the cost-benefit ratio per treatment group. The threshold was defined as the average total cost for oxygen treatment in patients in the ambient-air group who develop hypoxemia at which the cost for routine oxygen treatment per patient becomes the more cost-effective approach. The minimum hypoxia treatment cost assumed in the calculation was the average cost for routine oxygen therapy per Non-ST-elevation myocardial infarction (NSTEMI) patient from the DETO2X-AMI trial (37 USD).

In the threshold analysis, routine oxygen therapy becomes cost saving at 2,409 USD in patients with NSTEMI.
